# Supplementary material for: Hsp90-Mediated Multi-Drug Resistance in DNA Polymerase-Defective Strains of Candida albicans
Source: MDPI journal article supplement (doi:10.3390/jof10030222), 2024-03-19
Supplement: s1 [file s1]

## Supplementary Information

Article

# Hsp90-Mediated Multi-Drug Resistance in DNA Polymerase-Defective Strains of *Candida albicans*

Bhabasha Gyanadeep Utkalaja <sup>1,2</sup>, Satya Ranjan Sahu <sup>1,2</sup>, Sushree Subhashree Parida <sup>1,2</sup> and Narottam Acharya <sup>1,\*</sup>

<sup>1</sup> Laboratory of Genomic Instability and Diseases, Department of Infectious Disease Biology, Institute of Life Sciences, Bhubaneswar 751023, India

<sup>2</sup> Regional Center of Biotechnology, Faridabad 121001, India

\* Correspondence: narottam\_acharya@ils.res.in or narottam74@gmail.com;  
Tel.: +91-674-230-4278; Fax: +91-674-230-0728

Running title: Role of Hsp90 in drug resistance

Keywords: DNA replication, DNA polymerase epsilon, *Candida*, Candidiasis, Hsp90, azoles, drug resistance, biofilm

**Supplementary Figure S1:** (A). Overnight cultures of WT, *DPB3dpb3Δ*, *dpb3ΔΔ*, *DPB4dpb4Δ*, *dpb4ΔΔ*, and *dpb3ΔΔdpb4ΔΔ* strains were serially diluted and spotted on YPD plates without or with the indicated concentrations of 5FC and 5FU. All the plates were incubated at 30 °C for 48 hr and photographed. (B) Growth curve analyses of these strains were carried out in the presence of 5-FC (50 μM, i). The absorbance was measured at OD<sub>600</sub> for 21 hr at a regular interval (Supp. Table -5) and was plotted using GraphPad Prism 8.0. (C) Drug accumulation assay was carried by adding berberine to  $5 \times 10^7$  *C. albicans* cells in 1 x PBS and incubated at 30 °C in 200 rpm shaking condition. Cells were collected at regular interval and fluorescence was measured in an ELISA plate reader with the excitation and emission wavelength of 360 nm and 520 nm, respectively. Asterisks indicate (\*\*\*\* $P \leq 0.0001$ , \*\*\* $P \leq 0.001$ , \*\* $P \leq 0.01$ , and \* $P < 0.05$ ) the statistically significant differences between the results of WT and mutant strains using a two-way ANOVA test.

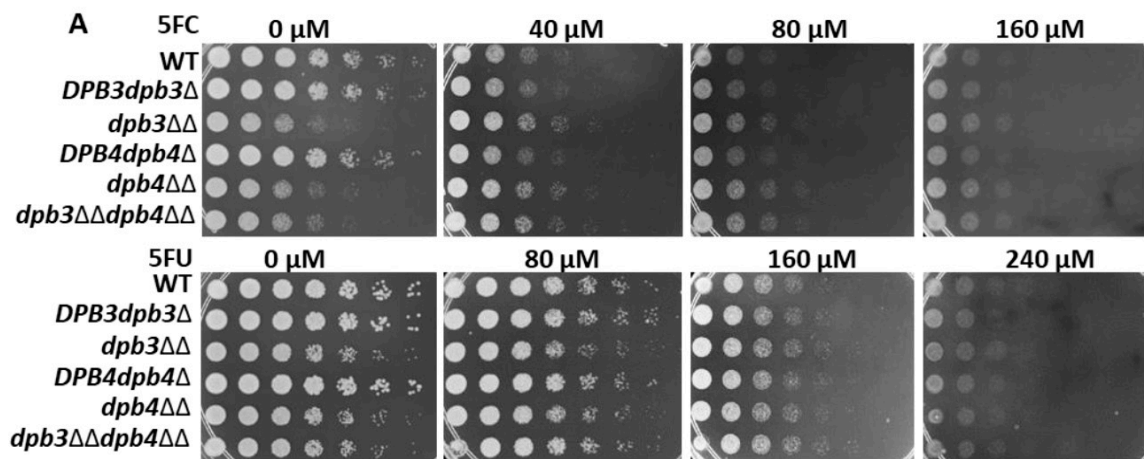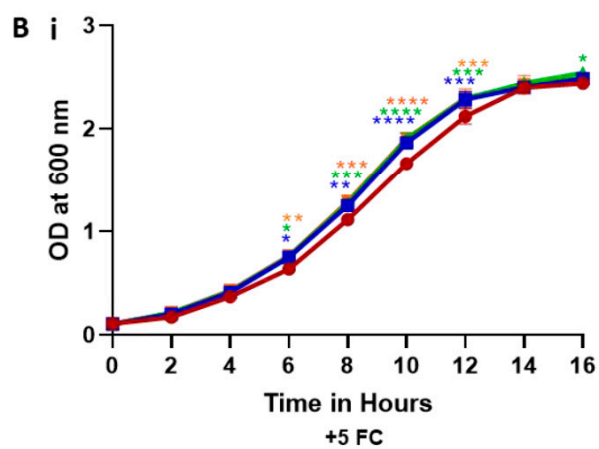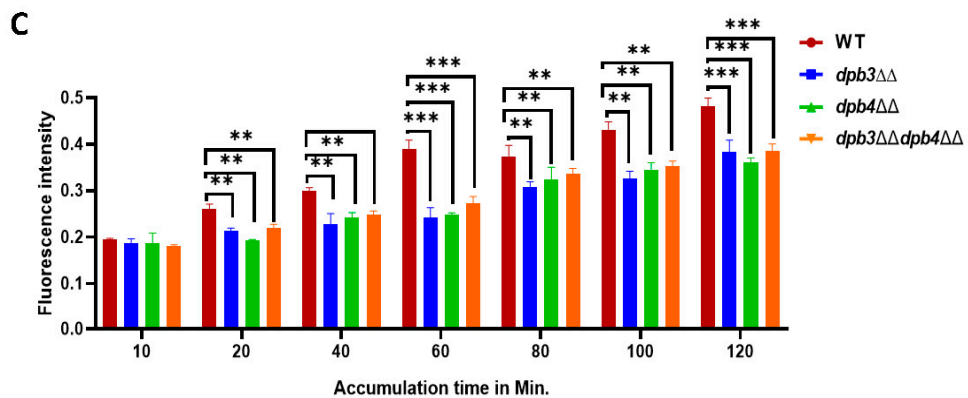

**Supplementary Table-S1:** The growth curve analyses of WT, *dpb3* $\Delta\Delta$ , *dpb4* $\Delta\Delta$ , and *dpb3* $\Delta\Delta*dpb4* $\Delta\Delta$  strains were carried out without (a) and with fluconazole (b), amphotericin B (c), and caspofungin (d). The absorbance measured at different time points and statistical analysis has been given as tables.$

(a) without any drugs

|       |           |       |         | Average of averages<br>± SD | <i>dpb3</i> ΔΔ | Average | Average of averages<br>± SD | <i>dpb4</i> ΔΔ | Average | Average of averages<br>± SD | <i>dpb3</i> ΔΔ<br><i>dpb4</i> ΔΔ | Average | Average of averages<br>± SD | P value                 |                         |                                           |
|-------|-----------|-------|---------|-----------------------------|----------------|---------|-----------------------------|----------------|---------|-----------------------------|----------------------------------|---------|-----------------------------|-------------------------|-------------------------|-------------------------------------------|
|       | Time(hrs) | WT    | Average |                             |                |         |                             |                |         |                             |                                  |         |                             | WT vs<br><i>dpb3</i> ΔΔ | WT vs<br><i>dpb4</i> ΔΔ | WT vs<br><i>dpb3</i> ΔΔ<br><i>dpb4</i> ΔΔ |
| Set 1 | 0         | 0.101 | 0.0995  | 0.103±0.035                 | 0.102          | 0.104   | 0.104±0.01                  | 0.103          | 0.105   | 0.10575±0.0007              | 0.104                            | 0.1015  | 0.10275±0.0012              | >0.9999                 | 0.9983                  | >0.9999                                   |
|       |           | 0.098 |         |                             | 0.106          |         |                             | 0.107          |         |                             | 0.099                            |         |                             |                         |                         |                                           |
|       |           | 0.106 |         |                             | 0.103          |         |                             | 0.105          |         |                             | 0.105                            |         |                             |                         |                         |                                           |
| Set 2 | 0         | 0.107 | 0.1065  | 0.103±0.035                 | 0.105          | 0.104   | 0.104±0.01                  | 0.108          | 0.1065  | 0.10575±0.0007              | 0.103                            | 0.104   | 0.10275±0.0012              | >0.9999                 | 0.9983                  | >0.9999                                   |
|       |           | 0.287 |         |                             | 0.249          |         |                             | 0.243          |         |                             | 0.253                            |         |                             |                         |                         |                                           |
|       |           | 0.291 |         |                             | 0.274          |         |                             | 0.265          |         |                             | 0.268                            |         |                             |                         |                         |                                           |
| Set 1 | 2         | 0.297 | 0.289   | 0.2935±0.0045               | 0.256          | 0.2615  | 0.262±0.005                 | 0.256          | 0.254   | 0.2495±0.0045               | 0.239                            | 0.255   | 0.25775±0.0027              | 0.3147                  | 0.1058                  | 0.2238                                    |
|       |           | 0.299 |         |                             | 0.269          |         |                             | 0.234          |         |                             | 0.271                            |         |                             |                         |                         |                                           |
|       |           | 0.801 |         |                             | 0.613          |         |                             | 0.574          |         |                             | 0.588                            |         |                             |                         |                         |                                           |
| Set 1 | 4         | 0.789 | 0.795   | 0.79475±0.00025             | 0.587          | 0.6     | 0.591±0.009                 | 0.581          | 0.5775  | 0.57275±0.004               | 0.549                            | 0.5685  | 0.57725±0.0087              | <0.0001                 | <0.0001                 | <0.0001                                   |
|       |           | 0.79  |         |                             | 0.601          |         |                             | 0.587          |         |                             | 0.578                            |         |                             |                         |                         |                                           |
|       |           | 0.799 |         |                             | 0.563          |         |                             | 0.549          |         |                             | 0.594                            |         |                             |                         |                         |                                           |
| Set 2 | 4         | 0.799 | 0.7945  | 0.79475±0.00025             | 0.563          | 0.582   | 0.591±0.009                 | 0.549          | 0.568   | 0.57275±0.004               | 0.594                            | 0.586   | 0.57725±0.0087              | <0.0001                 | <0.0001                 | <0.0001                                   |
|       |           | 1.765 |         |                             | 1.313          |         |                             | 1.265          |         |                             | 1.265                            |         |                             |                         |                         |                                           |
|       |           | 1.819 |         |                             | 1.298          |         |                             | 1.297          |         |                             | 1.285                            |         |                             |                         |                         |                                           |
| Set 1 | 6         | 1.762 | 1.792   | 1.79025±0.0017              | 1.323          | 1.3055  | 1.308±0.025                 | 1.198          | 1.281   | 1.27275±0.008               | 1.242                            | 1.275   | 1.25675±0.0182              | <0.0001                 | <0.0001                 | <0.0001                                   |
|       |           | 1.815 |         |                             | 1.298          |         |                             | 1.331          |         |                             | 1.235                            |         |                             |                         |                         |                                           |
|       |           | 2.734 |         |                             | 2.207          |         |                             | 2.259          |         |                             | 2.291                            |         |                             |                         |                         |                                           |
| Set 2 | 6         | 2.734 | 1.7885  | 1.79025±0.0017              | 2.207          | 1.3105  | 1.308±0.025                 | 2.259          | 1.2645  | 1.27275±0.008               | 2.291                            | 1.2385  | 1.25675±0.0182              | <0.0001                 | <0.0001                 | <0.0001                                   |
|       |           | 2.845 |         |                             | 2.224          |         |                             | 2.249          |         |                             | 2.285                            |         |                             |                         |                         |                                           |
|       |           | 2.66  |         |                             | 2.195          |         |                             | 2.276          |         |                             | 2.327                            |         |                             |                         |                         |                                           |
| Set 1 | 8         | 2.785 | 2.7895  | 2.756±0.0335                | 2.203          | 2.2155  | 2.20725±0.0082              | 2.109          | 2.254   | 2.22325±0.030               | 2.212                            | 2.288   | 2.27875±0.0092              | <0.0001                 | <0.0001                 | <0.0001                                   |
|       |           | 3.119 |         |                             | 2.632          |         |                             | 2.532          |         |                             | 2.548                            |         |                             |                         |                         |                                           |
|       |           | 3.167 |         |                             | 2.597          |         |                             | 2.56           |         |                             | 2.532                            |         |                             |                         |                         |                                           |
| Set 2 | 8         | 3.124 | 2.7225  | 2.756±0.0335                | 2.532          | 2.6145  | 2.5875±0.027                | 2.514          | 2.546   | 2.52125±0.024               | 2.538                            | 2.54    | 2.513±0.027                 | <0.0001                 | <0.0001                 | <0.0001                                   |
|       |           | 3.133 |         |                             | 2.589          |         |                             | 2.479          |         |                             | 2.434                            |         |                             |                         |                         |                                           |
|       |           | 3.298 |         |                             | 3.218          |         |                             | 3.278          |         |                             | 3.217                            |         |                             |                         |                         |                                           |
| Set 1 | 10        | 3.347 | 3.143   | 3.13575±0.0072              | 3.279          | 3.2485  | 3.24575±0.027               | 3.254          | 3.266   | 3.24025±0.025               | 3.298                            | 3.2575  | 3.247±0.0105                | 0.0033                  | 0.0016                  | 0.0038                                    |
|       |           | 3.314 |         |                             | 3.198          |         |                             | 3.224          |         |                             | 3.204                            |         |                             |                         |                         |                                           |
|       |           | 3.321 |         |                             | 3.288          |         |                             | 3.205          |         |                             | 3.269                            |         |                             |                         |                         |                                           |
| Set 2 | 10        | 3.376 | 3.1285  | 3.13575±0.0072              | 3.31           | 3.243   | 3.24575±0.027               | 3.367          | 3.2145  | 3.24025±0.025               | 3.331                            | 3.2365  | 3.247±0.0105                | 0.0033                  | 0.0016                  | 0.0038                                    |
|       |           | 3.314 |         |                             | 3.198          |         |                             | 3.224          |         |                             | 3.204                            |         |                             |                         |                         |                                           |
|       |           | 3.354 |         |                             | 3.288          |         |                             | 3.205          |         |                             | 3.269                            |         |                             |                         |                         |                                           |
| Set 1 | 12        | 3.364 | 3.3225  | 3.32±0.0025                 | 3.317          | 3.3135  | 3.301±0.125                 | 3.373          | 3.37    | 3.35775±0.012               | 3.365                            | 3.348   | 3.31925±0.0287              | 0.0154                  | 0.9903                  | 0.111                                     |
|       |           | 3.354 |         |                             | 3.317          |         |                             | 3.373          |         |                             | 3.365                            |         |                             |                         |                         |                                           |
|       |           | 3.364 |         |                             | 3.276          |         |                             | 3.351          |         |                             | 3.301                            |         |                             |                         |                         |                                           |
| Set 2 | 12        | 3.354 | 3.3225  | 3.32±0.0025                 | 3.317          | 3.3135  | 3.301±0.125                 | 3.373          | 3.37    | 3.35775±0.012               | 3.365                            | 3.348   | 3.31925±0.0287              | 0.0154                  | 0.9903                  | 0.111                                     |
|       |           | 3.354 |         |                             | 3.317          |         |                             | 3.373          |         |                             | 3.365                            |         |                             |                         |                         |                                           |
|       |           | 3.364 |         |                             | 3.276          |         |                             | 3.351          |         |                             | 3.301                            |         |                             |                         |                         |                                           |

(b) with fluconazole

|       |           |       |         | Average<br>of<br>averages<br>± SD |         |               | Average<br>of<br>averages<br>± SD |               |         | Average<br>of<br>averages<br>± SD |         |               | Average<br>of<br>averages<br>± SD |               | P value                |                        |                                         |        |                |               |               |         |         |         |
|-------|-----------|-------|---------|-----------------------------------|---------|---------------|-----------------------------------|---------------|---------|-----------------------------------|---------|---------------|-----------------------------------|---------------|------------------------|------------------------|-----------------------------------------|--------|----------------|---------------|---------------|---------|---------|---------|
|       | Time(hrs) | WT    | Average | <i>dpb3ΔΔ</i>                     | Average | <i>dpb4ΔΔ</i> | Average                           | <i>dpb3ΔΔ</i> | Average | <i>dpb3ΔΔ</i>                     | Average | <i>dpb3ΔΔ</i> | <i>dpb3ΔΔ</i>                     | <i>dpb3ΔΔ</i> | WT vs<br><i>dpb3ΔΔ</i> | WT vs<br><i>dpb4ΔΔ</i> | WT vs<br><i>dpb3ΔΔ</i><br><i>dpb4ΔΔ</i> |        |                |               |               |         |         |         |
| Set 1 | 0         | 0.103 | 0.104   | 0.1015±0.002                      | 0.109   | 0.1065        | 0.10475±0.0017                    | 0.108         | 0.1055  | 0.1045±0.001                      | 0.11    | 0.109         | 0.108±0.001                       | 0.995         | 0.9961                 | 0.9635                 |                                         |        |                |               |               |         |         |         |
|       |           | 0.105 |         |                                   | 0.104   |               |                                   | 0.103         |         |                                   | 0.108   |               |                                   |               |                        |                        |                                         |        |                |               |               |         |         |         |
| Set 2 | 0         | 0.1   | 0.105   |                                   | 0.101   | 0.103         |                                   | 0.105         | 0.102   |                                   | 0.1035  | 0.106         |                                   |               |                        |                        | 0.107                                   | 0.108  | 0.106          | 0.107         | 0.108         | 0.109   |         |         |
|       |           | 0.098 | 0.099   |                                   | 0.083   | 0.853         |                                   | 0.873         | 0.873   |                                   | 0.899   | 0.869         |                                   |               |                        |                        | 0.882                                   | 0.886  | 0.891          | 0.8915        | 0.88675±0.004 | 0.9925  | 0.65    | 0.9635  |
| Set 1 | 6         | 0.901 | 0.872   | 0.1015±0.008                      | 0.886   | 0.8695        | 0.8765±0.007                      | 0.923         | 0.898   | 0.89675±0.001                     | 0.914   | 0.8915        | 0.88675±0.001                     | 0.9925        | 0.65                   | 0.9635                 |                                         |        |                |               |               |         |         |         |
|       |           | 0.891 |         |                                   | 0.876   |               |                                   | 0.854         |         |                                   | 0.871   |               |                                   |               |                        |                        | 0.871                                   | 0.882  | 0.882          |               |               |         |         |         |
| Set 2 | 6         | 0.886 | 0.8885  |                                   | 0.891   | 0.8835        |                                   | 0.937         | 0.8955  |                                   | 0.937   | 0.8955        |                                   |               |                        |                        | 0.893                                   | 0.882  | 0.893          | 0.882         | 0.88675±0.004 | 0.9925  | 0.65    | 0.9635  |
|       |           | 0.984 |         |                                   | 1.246   |               |                                   | 1.259         |         |                                   | 1.259   |               |                                   |               |                        |                        | 1.263                                   |        | 1.263          |               | 1.28025±0.001 | <0.0001 | <0.0001 | <0.0001 |
| Set 1 | 9         | 1.031 | 1.0075  | 0.1015±0.010                      | 1.273   | 1.2595        | 1.25475±0.004                     | 1.293         | 1.276   | 1.27875±0.002                     | 1.301   | 1.282         | 1.28025±0.001                     | <0.0001       | <0.0001                | <0.0001                |                                         |        |                |               |               |         |         |         |
|       |           | 0.976 | 1.239   |                                   | 1.276   |               |                                   | 1.276         |         |                                   | 1.259   |               |                                   |               |                        |                        | 1.259                                   | 1.259  | 1.259          |               |               |         |         |         |
| Set 2 | 9         | 0.996 | 0.986   |                                   | 1.261   | 1.25          |                                   | 1.287         | 1.2815  |                                   | 1.287   | 1.2815        |                                   |               |                        |                        | 1.298                                   | 1.2785 | 1.298          | 1.2785        | 1.28025±0.001 | <0.0001 | <0.0001 | <0.0001 |
|       |           |       |         |                                   |         |               |                                   |               |         |                                   |         |               |                                   |               |                        |                        |                                         |        |                |               |               |         |         |         |
| Set 1 | 12        | 1.143 | 1.098   | 0.1015±0.02                       | 1.286   | 1.3195        | 1.324±0.004                       | 1.339         | 1.3325  | 1.3305±0.002                      | 1.373   | 1.3135        | 1.33±0.016                        | <0.0001       | <0.0001                | <0.0001                |                                         |        |                |               |               |         |         |         |
|       |           | 1.053 |         |                                   | 1.353   |               |                                   | 1.326         |         |                                   | 1.254   |               |                                   |               |                        |                        | 1.254                                   | 1.254  | 1.254          | 1.254         |               |         |         |         |
| Set 2 | 12        | 1.159 | 1.138   |                                   | 1.312   | 1.345         |                                   | 1.3285        | 1.359   |                                   | 1.298   | 1.3285        |                                   |               |                        |                        | 1.369                                   | 1.324  | 1.3465         | 1.33±0.016    | <0.0001       | <0.0001 | <0.0001 |         |
|       |           | 1.117 |         |                                   | 1.345   | 1.3285        |                                   | 1.359         | 1.298   |                                   | 1.3285  | 1.369         |                                   |               |                        |                        | 1.324                                   | 1.3465 | 1.33±0.016     | <0.0001       | <0.0001       | <0.0001 |         |         |
| Set 1 | 15        | 1.273 | 1.2105  | 0.1015±0.0172                     | 1.473   | 1.4355        | 1.43575±0.0002                    | 1.456         | 1.444   | 1.44625±0.002                     | 1.473   | 1.451         | 1.45875±0.007                     | <0.0001       | <0.0001                | <0.0001                |                                         |        |                |               |               |         |         |         |
|       |           | 1.148 |         |                                   | 1.398   |               |                                   | 1.432         |         |                                   | 1.429   |               |                                   |               |                        |                        | 1.429                                   | 1.429  | 1.429          | 1.429         |               |         |         |         |
| Set 2 | 15        | 1.265 | 1.245   |                                   | 1.457   | 1.436         |                                   | 1.476         | 1.4485  |                                   | 1.487   | 1.4485        |                                   |               |                        |                        | 1.487                                   | 1.4665 | 1.4665         | 1.45875±0.007 | <0.0001       | <0.0001 | <0.0001 |         |
|       |           | 1.225 |         |                                   | 1.415   | 1.421         |                                   | 1.4485        | 1.446   |                                   | 1.4665  | 1.4665        |                                   |               |                        |                        | 1.4665                                  | 1.4665 | 1.4665         | 1.4665        | 1.4665        | <0.0001 | <0.0001 | <0.0001 |
| Set 1 | 18        | 1.253 | 1.268   | 0.1015±0.0165                     | 1.523   | 1.506         | 1.525±0.019                       | 1.514         | 1.488   | 1.50975±0.021                     | 1.541   | 1.512         | 1.52225±0.0102                    | <0.0001       | <0.0001                | <0.0001                |                                         |        |                |               |               |         |         |         |
|       |           | 1.283 |         |                                   | 1.489   |               |                                   | 1.462         |         |                                   | 1.483   |               |                                   |               |                        |                        | 1.483                                   | 1.483  | 1.483          | 1.483         |               |         |         |         |
| Set 2 | 18        | 1.298 | 1.301   |                                   | 1.559   | 1.544         |                                   | 1.545         | 1.5315  |                                   | 1.562   | 1.5325        |                                   |               |                        |                        | 1.562                                   | 1.5325 | 1.52225±0.0102 | <0.0001       | <0.0001       | <0.0001 |         |         |
|       |           | 1.304 |         |                                   | 1.529   | 1.518         |                                   | 1.5315        | 1.503   |                                   | 1.5325  | 1.503         |                                   |               |                        |                        | 1.5325                                  | 1.503  | 1.5325         | 1.503         | 1.5325        | <0.0001 | <0.0001 | <0.0001 |
| Set 1 | 21        | 1.334 | 1.3185  | 0.1015±0.009                      | 1.643   | 1.6375        | 1.66425±0.026                     | 1.673         | 1.6685  | 1.6555±0.013                      | 1.694   | 1.6455        | 1.652±0.0065                      | <0.0001       | <0.0001                | <0.0001                |                                         |        |                |               |               |         |         |         |
|       |           | 1.303 |         |                                   | 1.632   |               |                                   | 1.612         |         |                                   | 1.623   |               |                                   |               |                        |                        | 1.623                                   | 1.623  | 1.623          | 1.623         |               |         |         |         |
| Set 2 | 21        | 1.319 | 1.3365  |                                   | 1.679   | 1.691         |                                   | 1.698         | 1.678   |                                   | 1.698   | 1.678         |                                   |               |                        |                        | 1.698                                   | 1.641  | 1.6455         | 1.652±0.0065  | <0.0001       | <0.0001 | <0.0001 |         |
|       |           | 1.354 |         |                                   | 1.703   | 1.639         |                                   | 1.641         | 1.641   |                                   | 1.641   | 1.641         |                                   |               |                        |                        | 1.641                                   | 1.641  | 1.641          | 1.641         | 1.641         | <0.0001 | <0.0001 | <0.0001 |
| Set 1 | 24        | 1.394 | 1.3885  | 0.1015±0.0017                     | 1.743   | 1.7285        | 1.73625±0.0077                    | 1.798         | 1.748   | 1.7685±0.0205                     | 1.763   | 1.738         | 1.76175±0.023                     | <0.0001       | <0.0001                | <0.0001                |                                         |        |                |               |               |         |         |         |
|       |           | 1.383 |         |                                   | 1.714   |               |                                   | 1.698         |         |                                   | 1.713   |               |                                   |               |                        |                        | 1.713                                   | 1.713  | 1.713          | 1.713         | 1.713         | 1.713   | 1.713   | 1.713   |
| Set 2 | 24        | 1.379 | 1.385   |                                   | 1.734   | 1.744         |                                   | 1.81          | 1.789   |                                   | 1.798   | 1.789         |                                   |               |                        |                        | 1.798                                   | 1.773  | 1.7855         | 1.76175±0.023 | <0.0001       | <0.0001 | <0.0001 |         |
|       |           | 1.391 |         |                                   | 1.754   | 1.768         |                                   | 1.773         | 1.773   |                                   | 1.773   | 1.773         |                                   |               |                        |                        | 1.773                                   | 1.773  | 1.773          | 1.773         | 1.773         | 1.773   | 1.773   | 1.773   |

## (c) with amphotericin b

|       |           |       |         | Average of averages<br>± SD |         |        | Average of averages<br>± SD |         |                | Average of averages<br>± SD      |         |                             | Average of averages<br>± SD |                      |                                        | P value |  |  |
|-------|-----------|-------|---------|-----------------------------|---------|--------|-----------------------------|---------|----------------|----------------------------------|---------|-----------------------------|-----------------------------|----------------------|----------------------------------------|---------|--|--|
|       | Time(hrs) | WT    | Average | <i>dpb3</i> ΔΔ              | Average |        | <i>dpb4</i> ΔΔ              | Average |                | <i>dpb3</i> ΔΔ<br><i>dpb4</i> ΔΔ | Average | Average of averages<br>± SD | WT vs <i>dpb3</i> ΔΔ        | WT vs <i>dpb4</i> ΔΔ | WT vs <i>dpb3</i> ΔΔ<br><i>dpb4</i> ΔΔ |         |  |  |
| Set 1 | 0         | 0.097 | 0.0985  | 0.101 ± 0.002               | 0.117   | 0.111  | 0.096                       | 0.1     | 0.10325±0.003  | 0.112                            | 0.11    | 0.108±0.002                 | 0.9949                      | 0.9997               | 0.9929                                 |         |  |  |
|       |           | 0.1   |         |                             | 0.105   |        | 0.104                       |         |                | 0.108                            |         |                             |                             |                      |                                        |         |  |  |
|       |           | 0.104 |         |                             | 0.105   |        | 0.103                       |         |                | 0.105                            |         |                             |                             |                      |                                        |         |  |  |
| Set 2 | 0         | 0.103 | 0.1035  | 0.102                       | 0.102   | 0.1035 | 0.11                        | 0.1065  | 0.107          | 0.106                            | 0.106   | 0.108±0.002                 | 0.9949                      | 0.9997               | 0.9929                                 |         |  |  |
|       |           | 0.125 |         |                             | 0.187   |        | 0.127                       |         |                |                                  |         |                             |                             |                      |                                        | 0.15    |  |  |
|       |           | 0.121 |         |                             | 0.165   |        | 0.133                       |         |                |                                  |         |                             |                             |                      |                                        | 0.157   |  |  |
| Set 1 | 3         | 0.135 | 0.123   | 0.1315 ± 0.009              | 0.191   | 0.176  | 0.145                       | 0.15    | 0.1425±0.012   | 0.164                            | 0.1535  | 0.1605±0.007                | 0.3411                      | 0.9738               | 0.7008                                 |         |  |  |
|       |           | 0.145 |         |                             | 0.172   |        | 0.165                       |         |                | 0.171                            |         |                             |                             |                      |                                        |         |  |  |
|       |           | 0.15  |         |                             | 0.268   |        | 0.181                       |         |                | 0.182                            |         |                             |                             |                      |                                        |         |  |  |
| Set 1 | 6         | 0.158 | 0.154   | 0.16725 ± 0.013             | 0.26    | 0.264  | 0.185                       | 0.183   | 0.20275±0.019  | 0.176                            | 0.179   | 0.2175±0.038                | 0.0073                      | 0.5635               | 0.2942                                 |         |  |  |
|       |           | 0.176 |         |                             | 0.271   |        | 0.211                       |         |                | 0.245                            |         |                             |                             |                      |                                        |         |  |  |
|       |           | 0.185 |         |                             | 0.289   |        | 0.234                       |         |                | 0.267                            |         |                             |                             |                      |                                        |         |  |  |
| Set 2 | 6         | 0.218 | 0.1805  | 0.218                       | 0.406   | 0.28   | 0.258                       | 0.2225  | 0.2019         | 0.272                            | 0.256   | 0.038                       | 0.0073                      | 0.5635               | 0.2942                                 |         |  |  |
|       |           | 0.211 |         |                             | 0.389   |        | 0.261                       |         |                | 0.263                            |         |                             |                             |                      |                                        |         |  |  |
|       |           | 0.23  |         |                             | 0.398   |        | 0.382                       |         |                | 0.298                            |         |                             |                             |                      |                                        |         |  |  |
| Set 2 | 9         | 0.254 | 0.242   | 0.22825 ± 0.013             | 0.437   | 0.4175 | 0.345                       | 0.3635  | 0.3115±0.052   | 0.363                            | 0.3305  | 0.299±0.031                 | <0.0001                     | 0.0381               | 0.0897                                 |         |  |  |
|       |           | 0.325 |         |                             | 0.634   |        | 0.647                       |         |                | 0.81                             |         |                             |                             |                      |                                        |         |  |  |
|       |           | 0.365 |         |                             | 0.589   |        | 0.741                       |         |                | 0.912                            |         |                             |                             |                      |                                        |         |  |  |
| Set 1 | 12        | 0.372 | 0.345   | 0.364 ± 0.019               | 0.687   | 0.6115 | 0.679                       | 0.694   | 0.69475±0.0007 | 0.789                            | 0.786   | 0.8235±0.037                | <0.0001                     | <0.0001              | <0.0001                                |         |  |  |
|       |           | 0.394 |         |                             | 0.659   |        | 0.712                       |         |                | 0.783                            |         |                             |                             |                      |                                        |         |  |  |
|       |           | 0.772 |         |                             | 1.152   |        | 1.156                       |         |                | 1.214                            |         |                             |                             |                      |                                        |         |  |  |
| Set 1 | 15        | 0.662 | 0.717   | 0.72675 ± 0.0009            | 1.231   | 1.1915 | 1.197                       | 1.1765  | 1.24375±0.067  | 1.452                            | 1.333   | 1.34225±0.009               | <0.0001                     | <0.0001              | <0.0001                                |         |  |  |
|       |           | 0.757 |         |                             | 1.257   |        | 1.324                       |         |                | 1.317                            |         |                             |                             |                      |                                        |         |  |  |
|       |           | 0.716 |         |                             | 1.298   |        | 1.298                       |         |                | 1.386                            |         |                             |                             |                      |                                        |         |  |  |
| Set 2 | 15        | 0.716 | 0.7365  | 0.72675 ± 0.0009            | 1.298   | 1.2775 | 1.298                       | 1.311   | 1.24375±0.067  | 1.386                            | 1.3515  | 1.34225±0.009               | <0.0001                     | <0.0001              | <0.0001                                |         |  |  |
|       |           | 1.432 |         |                             | 2.532   |        | 2.432                       |         |                | 2.887                            |         |                             |                             |                      |                                        |         |  |  |
|       |           | 1.398 |         |                             | 2.641   |        | 2.394                       |         |                | 2.485                            |         |                             |                             |                      |                                        |         |  |  |
| Set 1 | 18        | 1.454 | 1.415   | 1.4155 ± 0.0005             | 2.567   | 2.5865 | 2.367                       | 2.413   | 2.41925±0.006  | 2.798                            | 2.686   | 2.672±0.014                 | <0.0001                     | <0.0001              | <0.0001                                |         |  |  |
|       |           | 1.378 |         |                             | 2.521   |        | 2.484                       |         |                | 2.518                            |         |                             |                             |                      |                                        |         |  |  |
|       |           | 2.841 |         |                             | 2.846   |        | 2.848                       |         |                | 2.881                            |         |                             |                             |                      |                                        |         |  |  |
| Set 1 | 21        | 2.732 | 2.7865  | 2.7665 ± 0.02               | 2.883   | 2.8645 | 2.832                       | 2.84    | 2.854±0.014    | 2.848                            | 2.8645  | 2.86575±0.001               | 0.0432                      | 0.0279               | 0.0113                                 |         |  |  |
|       |           | 2.654 |         |                             | 2.798   |        | 2.859                       |         |                | 2.889                            |         |                             |                             |                      |                                        |         |  |  |
|       |           | 2.839 |         |                             | 2.865   |        | 2.877                       |         |                | 2.845                            |         |                             |                             |                      |                                        |         |  |  |
| Set 2 | 21        | 2.885 | 2.7465  | 2.7665 ± 0.02               | 2.863   | 2.8315 | 2.863                       | 2.868   | 2.854±0.014    | 2.893                            | 2.867   | 2.86575±0.001               | 0.0432                      | 0.0279               | 0.0113                                 |         |  |  |
|       |           | 2.739 |         |                             | 2.841   |        | 2.889                       |         |                | 2.849                            |         |                             |                             |                      |                                        |         |  |  |
|       |           | 2.898 |         |                             | 2.863   |        | 2.898                       |         |                | 2.895                            |         |                             |                             |                      |                                        |         |  |  |
| Set 1 | 24        | 2.898 | 2.812   | 2.85025 ± 0.038             | 2.863   | 2.852  | 2.898                       | 2.876   | 2.884±0.008    | 2.895                            | 2.871   | 2.877±0.006                 | 0.977                       | 0.6002               | 0.7468                                 |         |  |  |
|       |           | 2.879 |         |                             | 2.863   |        | 2.898                       |         |                | 2.895                            |         |                             |                             |                      |                                        |         |  |  |
|       |           | 2.879 |         |                             | 2.876   |        | 2.886                       |         |                | 2.871                            |         |                             |                             |                      |                                        |         |  |  |

## (d) with caspofungin

|       |           |       |         | Average of averages<br>± SD |         |                | Average of averages<br>± SD |         |                | Average of averages<br>± SD      |         |               | Average of averages<br>± SD      |         |         | P value                 |                         |                                           |
|-------|-----------|-------|---------|-----------------------------|---------|----------------|-----------------------------|---------|----------------|----------------------------------|---------|---------------|----------------------------------|---------|---------|-------------------------|-------------------------|-------------------------------------------|
|       | Time(hrs) | WT    | Average | <i>dpb3</i> ΔΔ              | Average |                | <i>dpb4</i> ΔΔ              | Average |                | <i>dpb3</i> ΔΔ<br><i>dpb4</i> ΔΔ | Average |               | <i>dpb3</i> ΔΔ<br><i>dpb4</i> ΔΔ | Average |         | WT vs<br><i>dpb3</i> ΔΔ | WT vs<br><i>dpb4</i> ΔΔ | WT vs<br><i>dpb3</i> ΔΔ<br><i>dpb4</i> ΔΔ |
| Set 1 | 0         | 0.103 | 0.104   | 0.104                       | 0.1065  | 0.1035±0.003   | 0.108                       | 0.1055  | 0.10425±0.0012 | 0.11                             | 0.109   | 0.1065±0.002  | >0.9999                          | >0.9999 | 0.9997  |                         |                         |                                           |
|       |           | 0.105 |         |                             |         |                | 0.104                       |         |                | 0.103                            |         |               |                                  |         |         | 0.108                   |                         |                                           |
|       |           | 0.1   |         |                             |         |                | 0.095                       |         |                | 0.102                            |         |               |                                  |         |         | 0.106                   |                         |                                           |
| Set 2 | 0         | 0.108 | 0.104   | 0.106                       | 0.1005  | 0.1035±0.003   | 0.104                       | 0.103   | 0.10425±0.0012 | 0.102                            | 0.104   | 0.1065±0.002  | >0.9999                          | >0.9999 | 0.9997  |                         |                         |                                           |
|       |           | 0.108 |         |                             |         |                | 0.104                       |         |                | 0.102                            |         |               |                                  |         |         | 0.106                   |                         |                                           |
|       |           | 0.108 |         |                             |         |                | 0.104                       |         |                | 0.102                            |         |               |                                  |         |         | 0.106                   |                         |                                           |
| Set 1 | 8         | 0.401 | 0.426   | 0.409±0.017                 | 0.495   | 0.4835±0.011   | 0.494                       | 0.5075  | 0.5115±0.004   | 0.473                            | 0.493   | 0.49675±0.003 | 0.1307                           | 0.0258  | 0.063   |                         |                         |                                           |
|       |           | 0.451 |         |                             |         |                | 0.501                       |         |                | 0.521                            |         |               |                                  |         |         | 0.513                   |                         |                                           |
|       |           | 0.389 |         |                             |         |                | 0.459                       |         |                | 0.51                             |         |               |                                  |         |         | 0.495                   |                         |                                           |
| Set 2 | 8         | 0.395 | 0.392   | 0.409±0.017                 | 0.472   | 0.4835±0.011   | 0.521                       | 0.5155  | 0.5115±0.004   | 0.506                            | 0.5005  | 0.49675±0.003 | 0.1307                           | 0.0258  | 0.063   |                         |                         |                                           |
|       |           | 0.395 |         |                             |         |                | 0.485                       |         |                | 0.521                            |         |               |                                  |         |         | 0.506                   |                         |                                           |
|       |           | 0.395 |         |                             |         |                | 0.485                       |         |                | 0.521                            |         |               |                                  |         |         | 0.506                   |                         |                                           |
| Set 1 | 11        | 0.529 | 0.556   | 0.5515±0.004                | 0.645   | 0.658±0.013    | 0.701                       | 0.6525  | 0.665±0.012    | 0.663                            | 0.6805  | 0.68725±0.006 | 0.02                             | 0.0127  | 0.0028  |                         |                         |                                           |
|       |           | 0.583 |         |                             |         |                | 0.678                       |         |                | 0.604                            |         |               |                                  |         |         | 0.698                   |                         |                                           |
|       |           | 0.536 |         |                             |         |                | 0.673                       |         |                | 0.698                            |         |               |                                  |         |         | 0.678                   |                         |                                           |
| Set 2 | 11        | 0.558 | 0.547   | 0.5515±0.004                | 0.671   | 0.658±0.013    | 0.657                       | 0.6775  | 0.665±0.012    | 0.71                             | 0.694   | 0.68725±0.006 | 0.02                             | 0.0127  | 0.0028  |                         |                         |                                           |
|       |           | 0.558 |         |                             |         |                | 0.669                       |         |                | 0.657                            |         |               |                                  |         |         | 0.71                    |                         |                                           |
|       |           | 0.558 |         |                             |         |                | 0.669                       |         |                | 0.657                            |         |               |                                  |         |         | 0.71                    |                         |                                           |
| Set 1 | 15        | 0.649 | 0.675   | 0.67825±0.003               | 0.7975  | 0.79725±0.0002 | 0.789                       | 0.7785  | 0.79825±0.019  | 0.732                            | 0.7615  | 0.78925±0.027 | 0.0088                           | 0.0082  | 0.015   |                         |                         |                                           |
|       |           | 0.701 |         |                             |         |                | 0.801                       |         |                | 0.768                            |         |               |                                  |         |         | 0.791                   |                         |                                           |
|       |           | 0.689 |         |                             |         |                | 0.768                       |         |                | 0.81                             |         |               |                                  |         |         | 0.836                   |                         |                                           |
| Set 2 | 15        | 0.674 | 0.6815  | 0.67825±0.003               | 0.797   | 0.79725±0.0002 | 0.826                       | 0.818   | 0.79825±0.019  | 0.798                            | 0.817   | 0.78925±0.027 | 0.0088                           | 0.0082  | 0.015   |                         |                         |                                           |
|       |           | 0.674 |         |                             |         |                | 0.826                       |         |                | 0.826                            |         |               |                                  |         |         | 0.798                   |                         |                                           |
|       |           | 0.674 |         |                             |         |                | 0.826                       |         |                | 0.826                            |         |               |                                  |         |         | 0.798                   |                         |                                           |
| Set 1 | 18        | 0.695 | 0.709   | 0.73475±0.025               | 0.988   | 0.98±0.006     | 0.943                       | 0.9535  | 1.01875±0.065  | 0.994                            | 0.943   | 0.99525±0.052 | <0.0001                          | <0.0001 | <0.0001 |                         |                         |                                           |
|       |           | 0.723 |         |                             |         |                | 1.003                       |         |                | 0.964                            |         |               |                                  |         |         | 0.892                   |                         |                                           |
|       |           | 0.736 |         |                             |         |                | 0.954                       |         |                | 1.056                            |         |               |                                  |         |         | 1.106                   |                         |                                           |
| Set 2 | 18        | 0.785 | 0.7605  | 0.73475±0.025               | 0.976   | 0.98±0.006     | 1.112                       | 1.084   | 1.01875±0.065  | 0.989                            | 1.0475  | 0.99525±0.052 | <0.0001                          | <0.0001 | <0.0001 |                         |                         |                                           |
|       |           | 0.785 |         |                             |         |                | 0.998                       |         |                | 1.112                            |         |               |                                  |         |         | 0.989                   |                         |                                           |
|       |           | 0.785 |         |                             |         |                | 0.998                       |         |                | 1.112                            |         |               |                                  |         |         | 0.989                   |                         |                                           |
| Set 1 | 21        | 0.789 | 0.791   | 0.80375±0.012               | 1.154   | 1.173±0.019    | 1.09                        | 1.111   | 1.1575±0.046   | 1.121                            | 1.1285  | 1.1845±0.056  | <0.0001                          | <0.0001 | <0.0001 |                         |                         |                                           |
|       |           | 0.793 |         |                             |         |                | 1.187                       |         |                | 1.132                            |         |               |                                  |         |         | 1.136                   |                         |                                           |
|       |           | 0.81  |         |                             |         |                | 1.168                       |         |                | 1.21                             |         |               |                                  |         |         | 1.231                   |                         |                                           |
| Set 2 | 21        | 0.823 | 0.8165  | 0.80375±0.012               | 1.192   | 1.173±0.019    | 1.198                       | 1.204   | 1.1575±0.046   | 1.25                             | 1.2405  | 1.1845±0.056  | <0.0001                          | <0.0001 | <0.0001 |                         |                         |                                           |
|       |           | 0.823 |         |                             |         |                | 1.216                       |         |                | 1.198                            |         |               |                                  |         |         | 1.25                    |                         |                                           |
|       |           | 0.823 |         |                             |         |                | 1.216                       |         |                | 1.198                            |         |               |                                  |         |         | 1.25                    |                         |                                           |
| Set 1 | 24        | 0.851 | 0.872   | 0.8835±0.011                | 1.2925  | 1.31425±0.021  | 1.269                       | 1.2365  | 1.28575±0.049  | 1.314                            | 1.2935  | 1.31625±0.022 | <0.0001                          | <0.0001 | <0.0001 |                         |                         |                                           |
|       |           | 0.893 |         |                             |         |                | 1.339                       |         |                | 1.204                            |         |               |                                  |         |         | 1.273                   |                         |                                           |
|       |           | 0.893 |         |                             |         |                | 1.339                       |         |                | 1.204                            |         |               |                                  |         |         | 1.273                   |                         |                                           |
| Set 2 | 24        | 0.865 | 0.895   | 0.8835±0.011                | 1.336   | 1.31425±0.021  | 1.325                       | 1.335   | 1.28575±0.049  | 1.336                            | 1.339   | 1.31625±0.022 | <0.0001                          | <0.0001 | <0.0001 |                         |                         |                                           |
|       |           | 0.925 |         |                             |         |                | 1.351                       |         |                | 1.345                            |         |               |                                  |         |         | 1.342                   |                         |                                           |
|       |           | 0.925 |         |                             |         |                | 1.351                       |         |                | 1.345                            |         |               |                                  |         |         | 1.342                   |                         |                                           |

**Supplementary Table-S2:** Using TEM, the cell wall structure of WT and *dpb3Δdpb4Δ* cells was observed and thickness of the cell wall was measured. The average of cell wall thickness of three different cells was considered. The statistically significant differences between the results of WT and mutant strains was analyzed using unpaired t test.

|     |       |          |          |                   |          |          | P value                    |
|-----|-------|----------|----------|-------------------|----------|----------|----------------------------|
|     | WT    | Average  | SD       | <i>dpb3Δdpb4Δ</i> | Average  | SD       | WT Vs<br><i>dpb3Δdpb4Δ</i> |
| TEM | 78.99 | 86.20667 | 5.140054 | 208.05            | 177.5267 | 22.08192 | 0.00469306                 |
|     | 90.57 |          |          | 156.55            |          |          |                            |
|     | 89.06 |          |          | 167.98            |          |          |                            |

**Supplementary Table-S3:** Mean fluorescence intensity of aniline blue, concanavaline A, CFW stained cells of WT and *dpb3ΔΔdpb4ΔΔ* strains was determined using flow cytometry. Data were represented as mean and Standard deviation from triplicate values. The statistically significant differences between the results of the WT and mutant was determined using one way ordinary ANOVA (Dunnett's multiple comparison test).

|                     |     |          |          |               |          |          |               |          |          |                     |          |          | P value             |                     |                           |
|---------------------|-----|----------|----------|---------------|----------|----------|---------------|----------|----------|---------------------|----------|----------|---------------------|---------------------|---------------------------|
|                     | WT  | Average  | SD       | <i>dpb3ΔΔ</i> | Average  | SD       | <i>dpb4ΔΔ</i> | Average  | SD       | <i>dpb3ΔΔdpb4ΔΔ</i> | Average  | SD       | WT Vs <i>dpb3ΔΔ</i> | WT Vs <i>dpb4ΔΔ</i> | WT Vs <i>dpb3ΔΔdpb4ΔΔ</i> |
| Aniline blue        | 113 |          |          | 131.94        |          |          | 138           |          |          | 146.69              |          |          |                     |                     |                           |
|                     | 117 |          |          | 131.04        |          |          | 135           |          |          | 147.39              |          |          |                     |                     |                           |
|                     | 115 | 115      | 1.632993 | 130.96        | 131.3133 | 0.444322 | 137           | 136.6667 | 1.247219 | 147.27              | 147.1167 | 0.30565  | 0.0018              | 0.0006              | 0.0001                    |
| Concanav<br>aline A | 698 |          |          | 785           |          |          | 790           |          |          | 958                 |          |          |                     |                     |                           |
|                     | 593 |          |          | 893           |          |          | 834           |          |          | 896                 |          |          |                     |                     |                           |
|                     | 550 | 613.6667 | 62.16287 | 915           | 864.3333 | 56.81158 | 867           | 830.3333 | 31.54186 | 884                 | 912.6667 | 32.4277  | 0.002               | 0.0049              | 0.0006                    |
| CFW                 | 666 |          |          | 969           |          |          | 871           |          |          | 1088                |          |          |                     |                     |                           |
|                     | 689 |          |          | 1067          |          |          | 976           |          |          | 925                 |          |          |                     |                     |                           |
|                     | 712 | 689      | 18.77942 | 987           | 1007.667 | 42.59369 | 1011          | 952.6667 | 59.48856 | 1055                | 1022.667 | 70.36255 | 0.0007              | 0.0024              | 0.0005                    |

**Supplementary Table-S4:** The growth curve analyses of *dpb3ΔΔdpb4ΔΔ* strain (a) without and with geldanamycin alone (107nM ), fluconazole alone (6 μM), and a combination of both of the drugs, (b) without and with geldanamycin alone (107nM ), amp B alone (10 nM ), and a combination of both of the drugs, (c) without and with trichostatin A alone (0.8 μM), fluconazole alone (6 μM), and a combination of both of the drugs, and (d) without and with trichostatin A alone (0.8 μM), ampB alone (107nM ), and a combination of both of the drugs. The absorbance measured at different time points and statistical analysis has been given as tables.



(a)

|       |           |                                |         |                                   |                                              |         |                                   |                                                |         |                                   |                                                                                             |         |                                   |                                                                                                                        | P value |
|-------|-----------|--------------------------------|---------|-----------------------------------|----------------------------------------------|---------|-----------------------------------|------------------------------------------------|---------|-----------------------------------|---------------------------------------------------------------------------------------------|---------|-----------------------------------|------------------------------------------------------------------------------------------------------------------------|---------|
|       | Time(hrs) | <i>dpb3ΔΔ</i><br><i>dpb4ΔΔ</i> | Average | Average<br>of<br>averages<br>± SD | <i>dpb3ΔΔ</i><br><i>dpb4ΔΔ</i> +Geldanamycin | Average | Average<br>of<br>averages<br>± SD | <i>dpb3ΔΔ</i><br><i>dpb4ΔΔ</i> +<br><i>FLC</i> | Average | Average<br>of<br>averages<br>± SD | <i>dpb3ΔΔ</i><br><i>dpb4ΔΔ</i> +<br><i>FLC</i> + <i>Geld</i><br><i>anamycin</i><br><i>n</i> | Average | Average<br>of<br>averages<br>± SD | <i>dpb3ΔΔ</i><br><i>dpb4ΔΔ</i> + <i>FLC</i> vs<br><i>dpb3ΔΔ</i><br><i>dpb4ΔΔ</i> + <i>FLC</i> +<br><i>Geldanamycin</i> |         |
| Set 1 | 0         | 0.094<br>0.097                 | 0.0955  | 0.0995±0.004                      | 0.094<br>0.097                               | 0.0955  | 0.0995±0.004                      | 0.098<br>0.101                                 | 0.0995  | 0.10375±0.004                     | 0.098<br>0.101                                                                              | 0.0995  | 0.10275±0.003                     | >0.9999                                                                                                                |         |
| Set 2 | 0         | 0.102<br>0.105                 | 0.1035  |                                   | 0.103<br>0.104                               | 0.1035  |                                   | 0.106<br>0.11                                  | 0.108   |                                   | 0.105<br>0.107                                                                              | 0.106   |                                   |                                                                                                                        |         |
| Set 1 | 3         | 0.351<br>0.359                 | 0.355   | 0.35175±0.003                     | 0.358<br>0.349                               | 0.3535  | 0.35425±0.007                     | 0.318<br>0.326                                 | 0.322   | 0.3275±0.005                      | 0.281<br>0.341                                                                              | 0.311   | 0.313±0.002                       | 0.7981                                                                                                                 |         |
| Set 2 | 3         | 0.345<br>0.352                 | 0.3485  |                                   | 0.345<br>0.365                               | 0.355   |                                   | 0.321<br>0.345                                 | 0.333   |                                   | 0.265<br>0.365                                                                              | 0.315   |                                   |                                                                                                                        |         |
| Set 1 | 6         | 1.277<br>1.266                 | 1.2715  | 1.27775±0.006                     | 1.254<br>1.265                               | 1.2595  | 1.25975±0.0002                    | 0.899<br>0.866                                 | 0.8825  | 0.875±0.007                       | 0.762<br>0.765                                                                              | 0.7635  | 0.76225±0.001                     | <0.0001                                                                                                                |         |
| Set 2 | 6         | 1.289<br>1.279                 | 1.284   |                                   | 1.275<br>1.245                               | 1.26    |                                   | 0.876<br>0.859                                 | 0.8675  |                                   | 0.751<br>0.771                                                                              | 0.761   |                                   |                                                                                                                        |         |
| Set 1 | 9         | 2.349<br>2.468                 | 2.4085  | 2.408±0.005                       | 2.412<br>2.354                               | 2.383   | 2.4075±0.024                      | 1.576<br>1.593                                 | 1.5845  | 1.58025±0.004                     | 1.368<br>1.358                                                                              | 1.363   | 1.36325±0.0002                    | <0.0001                                                                                                                |         |
| Set 2 | 9         | 2.339<br>2.476                 | 2.4075  |                                   | 2.523<br>2.341                               | 2.432   |                                   | 1.54<br>1.612                                  | 1.576   |                                   | 1.358<br>1.369                                                                              | 1.3635  |                                   |                                                                                                                        |         |
| Set 1 | 12        | 2.692<br>2.543                 | 2.6175  | 2.6155±0.002                      | 2.654<br>2.612                               | 2.633   | 2.64075±0.007                     | 2.401<br>2.465                                 | 2.433   | 2.4465±0.013                      | 1.475<br>1.531                                                                              | 1.503   | 1.50075±0.0022                    | <0.0001                                                                                                                |         |
| Set 2 | 12        | 2.701<br>2.526                 | 2.6135  |                                   | 2.665<br>2.632                               | 2.6485  |                                   | 2.445<br>2.475                                 | 2.46    |                                   | 1.485<br>1.512                                                                              | 1.4985  |                                   |                                                                                                                        |         |
| Set 1 | 15        | 2.742<br>2.643                 | 2.6925  | 2.694±0.015                       | 2.778<br>2.743                               | 2.7605  | 2.741±0.019                       | 2.635<br>2.598                                 | 2.6165  | 2.63425±0.017                     | 1.543<br>1.612                                                                              | 1.5775  | 1.568±0.0095                      | <0.0001                                                                                                                |         |
| Set 2 | 15        | 2.754<br>2.637                 | 2.6955  |                                   | 2.745<br>2.698                               | 2.7215  |                                   | 2.692<br>2.612                                 | 2.652   |                                   | 1.521<br>1.596                                                                              | 1.5585  |                                   |                                                                                                                        |         |
| Set 1 | 18        | 2.979<br>2.854                 | 2.9165  | 2.9075±0.009                      | 2.954<br>2.835                               | 2.8945  | 2.859±0.035                       | 2.739<br>2.821                                 | 2.78    | 2.78025±0.0002                    | 1.731<br>1.812                                                                              | 1.7715  | 1.787±0.0155                      | <0.0001                                                                                                                |         |
| Set 2 | 18        | 2.912<br>2.885                 | 2.8985  |                                   | 2.812<br>2.835                               | 2.8235  |                                   | 2.765<br>2.796                                 | 2.7805  |                                   | 1.795<br>1.81                                                                               | 1.8025  |                                   |                                                                                                                        |         |
| Set 1 | 21        | 2.987<br>2.968                 | 2.9775  | 2.97225±0.005                     | 2.896<br>2.969                               | 2.9325  | 2.9345±0.002                      | 2.854<br>2.898                                 | 2.876   | 2.87475±0.001                     | 2.052<br>2.012                                                                              | 2.032   | 2.027±0.005                       | <0.0001                                                                                                                |         |
| Set 2 | 21        | 2.976<br>2.958                 | 2.967   |                                   | 2.923<br>2.95                                | 2.9365  |                                   | 2.835<br>2.912                                 | 2.8735  |                                   | 2.042<br>2.002                                                                              | 2.022   |                                   |                                                                                                                        |         |
| Set 1 | 24        | 2.982<br>2.985                 | 2.9835  | 2.97975±0.003                     | 2.879<br>2.984                               | 2.9315  | 2.94425±0.012                     | 2.929<br>2.932                                 | 2.9305  | 2.9445±0.014                      | 2.265<br>2.214                                                                              | 2.2395  | 2.29375±0.0542                    | <0.0001                                                                                                                |         |
| Set 2 | 24        | 2.987<br>2.965                 | 2.976   |                                   | 2.956<br>2.958                               | 2.957   |                                   | 2.949<br>2.968                                 | 2.9585  |                                   | 2.375<br>2.321                                                                              | 2.348   |                                   |                                                                                                                        |         |

(b)

|       |           |                                |         |                                   |                                              |         |                                   |                                          |         |                                   |                                                               |         |                                   |                                                                                                  | P value |
|-------|-----------|--------------------------------|---------|-----------------------------------|----------------------------------------------|---------|-----------------------------------|------------------------------------------|---------|-----------------------------------|---------------------------------------------------------------|---------|-----------------------------------|--------------------------------------------------------------------------------------------------|---------|
|       | Time(hrs) | <i>dpb3ΔΔ</i><br><i>dpb4ΔΔ</i> | Average | Average<br>of<br>averages<br>± SD | <i>dpb3ΔΔ</i><br><i>dpb4ΔΔ</i> +Geldanamycin | Average | Average<br>of<br>averages<br>± SD | <i>dpb3ΔΔ</i><br><i>dpb4ΔΔ</i> +<br>AmpB | Average | Average<br>of<br>averages<br>± SD | <i>dpb3ΔΔ</i><br><i>dpb4ΔΔ</i> +<br>Amp<br>B+Geldana<br>mycin | Average | Average<br>of<br>averages<br>± SD | <i>dpb3ΔΔ</i><br><i>dpb4ΔΔ</i> +AmpB<br>vs <i>dpb3ΔΔ</i><br><i>dpb4ΔΔ</i> +AmpB<br>+Geldanamycin |         |
| Set 1 | 0         | 0.103                          | 0.104   | 0.10275±<br>0.001                 | 0.094                                        | 0.0955  | 0.0985±0.003                      | 0.113                                    | 0.111   | 0.1085±0.002                      | 0.108                                                         | 0.1135  | 0.1085±0.005                      | 0.9999                                                                                           |         |
|       |           | 0.105                          |         |                                   | 0.097                                        |         |                                   | 0.109                                    |         |                                   | 0.119                                                         |         |                                   |                                                                                                  |         |
| Set 2 | 0         | 0.103                          | 0.1015  | 0.1015                            | 0.098                                        | 0.1015  | 0.106                             | 0.105                                    | 0.106   | 0.1035                            | 0.103                                                         | 0.1035  | 0.1035                            | 0.9983                                                                                           |         |
|       |           | 0.1                            |         |                                   | 0.105                                        |         |                                   | 0.107                                    |         |                                   | 0.104                                                         |         |                                   |                                                                                                  |         |
| Set 1 | 3         | 0.279                          | 0.2865  | 0.29775±<br>0.011                 | 0.321                                        | 0.3095  | 0.323±0.013                       | 0.156                                    | 0.1645  | 0.16775±<br>0.003                 | 0.179                                                         | 0.172   | 0.172                             | 0.9983                                                                                           |         |
|       |           | 0.294                          |         |                                   | 0.298                                        |         |                                   | 0.173                                    |         |                                   | 0.165                                                         |         |                                   |                                                                                                  |         |
| Set 2 | 3         | 0.321                          | 0.309   | 0.309                             | 0.332                                        | 0.3365  | 13                                | 0.186                                    | 0.171   | 0.172                             | 0.179                                                         | 0.172   | 0.172                             | 0.9983                                                                                           |         |
|       |           | 0.297                          |         |                                   | 0.341                                        |         |                                   | 0.156                                    |         |                                   | 0.165                                                         |         |                                   |                                                                                                  |         |
| Set 1 | 6         | 1.162                          | 1.1535  | 1.154±0.005                       | 1.177                                        | 1.1665  | 1.1685±0.002                      | 0.417                                    | 0.411   | 0.411                             | 0.377                                                         | 0.366   | 0.366                             | 0.3693                                                                                           |         |
|       |           | 1.145                          |         |                                   | 1.156                                        |         |                                   | 0.405                                    |         |                                   | 0.355                                                         |         |                                   |                                                                                                  |         |
| Set 2 | 6         | 1.174                          | 1.1545  | 1.1545                            | 1.169                                        | 1.1705  | 0.02                              | 0.417                                    | 0.411   | 0.411                             | 0.377                                                         | 0.366   | 0.366                             | 0.3693                                                                                           |         |
|       |           | 1.135                          |         |                                   | 1.172                                        |         |                                   | 0.405                                    |         |                                   | 0.355                                                         |         |                                   |                                                                                                  |         |
| Set 1 | 9         | 2.245                          | 2.283   | 2.283                             | 2.349                                        | 2.3085  | 2.30625±<br>0.002                 | 0.857                                    | 0.798   | 0.798                             | 0.677                                                         | 0.6655  | 0.6655                            | 0.0007                                                                                           |         |
|       |           | 2.321                          |         |                                   | 2.268                                        |         |                                   | 0.739                                    |         |                                   | 0.654                                                         |         |                                   |                                                                                                  |         |
| Set 2 | 9         | 2.254                          | 2.283   | 2.283                             | 2.354                                        | 2.304   | 0.002                             | 0.857                                    | 0.798   | 0.798                             | 0.677                                                         | 0.6655  | 0.6655                            | 0.0007                                                                                           |         |
|       |           | 2.312                          |         |                                   | 2.254                                        |         |                                   | 0.739                                    |         |                                   | 0.654                                                         |         |                                   |                                                                                                  |         |
| Set 1 | 12        | 2.554                          | 2.576   | 2.576                             | 2.592                                        | 2.5675  | 2.5695±0.002                      | 1.713                                    | 1.622   | 1.622                             | 1.387                                                         | 1.3995  | 1.3995                            | <0.0001                                                                                          |         |
|       |           | 2.598                          |         |                                   | 2.543                                        |         |                                   | 1.531                                    |         |                                   | 1.412                                                         |         |                                   |                                                                                                  |         |
| Set 2 | 12        | 2.568                          | 2.576   | 2.576                             | 2.549                                        | 2.5715  | 0.002                             | 1.713                                    | 1.622   | 1.622                             | 1.387                                                         | 1.3995  | 1.3995                            | <0.0001                                                                                          |         |
|       |           | 2.584                          |         |                                   | 2.594                                        |         |                                   | 1.531                                    |         |                                   | 1.412                                                         |         |                                   |                                                                                                  |         |
| Set 1 | 15        | 2.745                          | 2.771   | 2.782±0.011                       | 2.742                                        | 2.6925  | 2.70925±<br>0.016                 | 2.759                                    | 2.7575  | 2.7575                            | 2.383                                                         | 2.401   | 2.401                             | <0.0001                                                                                          |         |
|       |           | 2.797                          |         |                                   | 2.643                                        |         |                                   | 2.756                                    |         |                                   | 2.419                                                         |         |                                   |                                                                                                  |         |
| Set 2 | 15        | 2.784                          | 2.793   | 2.793                             | 2.754                                        | 2.726   | 0.016                             | 2.759                                    | 2.7575  | 2.7575                            | 2.383                                                         | 2.401   | 2.401                             | <0.0001                                                                                          |         |
|       |           | 2.802                          |         |                                   | 2.698                                        |         |                                   | 2.756                                    |         |                                   | 2.419                                                         |         |                                   |                                                                                                  |         |
| Set 1 | 18        | 2.875                          | 2.8935  | 2.91725±<br>0.023                 | 2.949                                        | 2.9015  | 2.95375±<br>0.052                 | 2.854                                    | 2.8595  | 2.8595                            | 2.654                                                         | 2.646   | 2.646                             | <0.0001                                                                                          |         |
|       |           | 2.912                          |         |                                   | 2.854                                        |         |                                   | 2.865                                    |         |                                   | 2.638                                                         |         |                                   |                                                                                                  |         |
| Set 2 | 18        | 2.898                          | 2.941   | 2.941                             | 2.958                                        | 3.006   | 0.052                             | 2.854                                    | 2.8595  | 2.8595                            | 2.654                                                         | 2.646   | 2.646                             | <0.0001                                                                                          |         |
|       |           | 2.984                          |         |                                   | 3.054                                        |         |                                   | 2.865                                    |         |                                   | 2.638                                                         |         |                                   |                                                                                                  |         |
| Set 1 | 21        | 2.974                          | 2.9695  | 3.0025±0.033                      | 2.987                                        | 2.9775  | 3.0385±0.061                      | 2.845                                    | 2.8785  | 2.928±0.049                       | 2.832                                                         | 2.8385  | 2.909±0.007                       | 0.8818                                                                                           |         |
|       |           | 2.965                          |         |                                   | 2.968                                        |         |                                   | 2.912                                    |         |                                   | 2.845                                                         |         |                                   |                                                                                                  |         |
| Set 2 | 21        | 3.012                          | 3.0355  | 3.0355                            | 3.098                                        | 3.0995  | 0.061                             | 2.951                                    | 2.9775  | 2.9775                            | 2.985                                                         | 2.9795  | 2.9795                            | 0.8818                                                                                           |         |
|       |           | 3.059                          |         |                                   | 3.101                                        |         |                                   | 3.004                                    |         |                                   | 2.974                                                         |         |                                   |                                                                                                  |         |

(c)

|       |           |                                |         |                                   |                                                    |         |                                   |                                         |         |                                   |                                                        |         |                                   |                                   | P value                                                                                              |
|-------|-----------|--------------------------------|---------|-----------------------------------|----------------------------------------------------|---------|-----------------------------------|-----------------------------------------|---------|-----------------------------------|--------------------------------------------------------|---------|-----------------------------------|-----------------------------------|------------------------------------------------------------------------------------------------------|
|       | Time(hrs) | <i>dpb3ΔΔ</i><br><i>dpb4ΔΔ</i> | Average | Average<br>of<br>averages<br>± SD | <i>dpb3ΔΔ</i><br><i>dpb4ΔΔ</i> +<br>Trichostatin A | Average | Average<br>of<br>averages<br>± SD | <i>dpb3ΔΔ</i><br><i>dpb4ΔΔ</i> +<br>FLC | Average | Average<br>of<br>averages<br>± SD | <i>dpb3ΔΔ</i><br><i>dpb4ΔΔ</i> +<br>FLC+Trichostatin A | Average | Average<br>of<br>averages<br>± SD | Average<br>of<br>averages<br>± SD | <i>dpb3ΔΔ</i><br><i>dpb4ΔΔ</i> +<br>FLC vs<br><i>dpb3ΔΔ</i><br><i>dpb4ΔΔ</i> +<br>FLC+Trichostatin A |
| Set 1 | 0         | 0.094<br>0.097<br>0.101        | 0.0955  | 0.0995±0.004                      | 0.094<br>0.097<br>0.103                            | 0.0955  | 0.09975±0.004                     | 0.098<br>0.101<br>0.104                 | 0.0995  | 0.10225±0.0027                    | 0.098<br>0.101<br>0.103                                | 0.0995  | 0.10225±0.0027                    | 0.10225±0.0027                    | >0.9999                                                                                              |
| Set 2 | 0         | 0.106                          | 0.1035  |                                   | 0.105                                              | 0.104   |                                   | 0.106                                   | 0.105   |                                   | 0.107                                                  | 0.105   |                                   |                                   |                                                                                                      |
| Set 1 | 3         | 0.351<br>0.359                 | 0.355   |                                   | 0.358<br>0.349                                     | 0.3535  |                                   | 0.298<br>0.312                          | 0.305   |                                   | 0.318<br>0.352                                         | 0.335   |                                   |                                   |                                                                                                      |
| Set 2 | 3         | 0.326<br>0.365                 | 0.3455  | 0.35025±0.004                     | 0.346<br>0.374                                     | 0.36    | 0.35675±0.003                     | 0.305<br>0.321                          | 0.313   | 0.309±0.004                       | 0.298<br>0.315                                         | 0.3065  | 0.32075±0.004                     | 0.32075±0.004                     | 0.7994                                                                                               |
| Set 1 | 6         | 1.277<br>1.266                 | 1.2715  | 1.268±0.003                       | 1.25<br>1.255                                      | 1.2525  | 1.25775±0.005                     | 0.887<br>0.872                          | 0.8795  | 0.8895±0.001                      | 0.8<br>0.849                                           | 0.8245  | 0.84325±0.01                      | 0.84325±0.01                      | 0.0161                                                                                               |
| Set 2 | 6         | 1.253<br>1.276                 | 1.2645  |                                   | 1.267<br>1.259                                     | 1.263   |                                   | 0.887<br>0.912                          | 0.8995  |                                   | 0.845<br>0.879                                         | 0.862   |                                   |                                   |                                                                                                      |
| Set 1 | 9         | 2.349<br>2.468                 | 2.4085  |                                   | 2.442<br>2.361                                     | 2.4015  |                                   | 1.572<br>1.589                          | 1.5805  |                                   | 1.046<br>1.03                                          | 1.038   |                                   |                                   |                                                                                                      |
| Set 2 | 9         | 2.365<br>2.456                 | 2.4105  | 2.4095±0.001                      | 2.456<br>2.415                                     | 2.4355  | 2.4185±0.017                      | 1.567<br>1.573                          | 1.57    | 1.57525±0.005                     | 0.995<br>1.025                                         | 1.01    | 1.024±0.005                       | 1.024±0.005                       | <0.0001                                                                                              |
| Set 1 | 12        | 2.692<br>2.543                 | 2.6175  | 2.604±0.013                       | 2.633<br>2.646                                     | 2.6395  | 2.63875±0.007                     | 2.398<br>2.375                          | 2.3865  | 2.378±0.008                       | 1.243<br>1.305                                         | 1.274   | 1.269±0.008                       | 1.269±0.008                       | <0.0001                                                                                              |
| Set 2 | 12        | 2.569<br>2.612                 | 2.5905  |                                   | 2.622<br>2.654                                     | 2.638   |                                   | 2.354<br>2.385                          | 2.3695  |                                   | 1.23<br>1.298                                          | 1.264   |                                   |                                   |                                                                                                      |
| Set 1 | 15        | 2.742<br>2.783                 | 2.7625  |                                   | 2.756<br>2.749                                     | 2.7525  |                                   | 2.621<br>2.612                          | 2.6165  |                                   | 1.413<br>1.498                                         | 1.4555  |                                   |                                   |                                                                                                      |
| Set 2 | 15        | 2.698<br>2.721                 | 2.7095  | 2.736±0.026                       | 2.747<br>2.785                                     | 2.766   | 2.75925±0.006                     | 2.594<br>2.635                          | 2.6145  | 2.6155±0.001                      | 1.435<br>1.479                                         | 1.457   | 1.45625±0.001                     | 1.45625±0.001                     | <0.0001                                                                                              |
| Set 1 | 18        | 2.979<br>2.854                 | 2.9165  | 2.90025±0.016                     | 2.971<br>2.821                                     | 2.896   | 2.8765±0.019                      | 2.723<br>2.814                          | 2.7685  | 2.7695±0.001                      | 1.543<br>1.598                                         | 1.5705  | 1.562±0.001                       | 1.562±0.001                       | <0.0001                                                                                              |
| Set 2 | 18        | 2.865<br>2.903                 | 2.884   |                                   | 2.845<br>2.869                                     | 2.857   |                                   | 2.745<br>2.796                          | 2.7705  |                                   | 1.495<br>1.612                                         | 1.5535  |                                   |                                   |                                                                                                      |
| Set 1 | 21        | 2.987<br>2.968                 | 2.9775  |                                   | 2.883<br>2.959                                     | 2.921   |                                   | 2.872<br>2.895                          | 2.8835  |                                   | 1.725<br>1.754                                         | 1.7395  |                                   |                                   |                                                                                                      |
| Set 2 | 21        | 2.956<br>2.978                 | 2.967   | 2.97225±0.005                     | 2.798<br>2.987                                     | 2.8925  | 2.90675±0.014                     | 2.869<br>2.879                          | 2.874   | 2.87875±0.004                     | 1.684<br>1.736                                         | 1.71    | 1.72475±0.004                     | 1.72475±0.004                     | <0.0001                                                                                              |
| Set 1 | 24        | 2.982<br>2.985                 | 2.9835  | 2.98075±0.002                     | 2.983<br>2.98                                      | 2.9815  | 2.96325±0.018                     | 2.934<br>2.941                          | 2.9375  | 2.959±0.021                       | 1.845<br>2.056                                         | 1.9505  | 1.93725±0.021                     | 1.93725±0.021                     | <0.0001                                                                                              |
| Set 2 | 24        | 2.998<br>2.958                 | 2.978   |                                   | 2.896<br>2.994                                     | 2.945   |                                   | 2.975<br>2.986                          | 2.9805  |                                   | 1.864<br>1.984                                         | 1.924   |                                   |                                   |                                                                                                      |

(d)

|       |           |                                |         |                                   |                                                    |         |                                   |                                          |         |                                   |                                                         |         |                                   |                                   | P value                                                                                                |
|-------|-----------|--------------------------------|---------|-----------------------------------|----------------------------------------------------|---------|-----------------------------------|------------------------------------------|---------|-----------------------------------|---------------------------------------------------------|---------|-----------------------------------|-----------------------------------|--------------------------------------------------------------------------------------------------------|
|       | Time(hrs) | <i>dpb3ΔΔ</i><br><i>dpb4ΔΔ</i> | Average | Average<br>of<br>averages<br>± SD | <i>dpb3ΔΔ</i><br><i>dpb4ΔΔ</i> +<br>Trichostatin A | Average | Average<br>of<br>averages<br>± SD | <i>dpb3ΔΔ</i><br><i>dpb4ΔΔ</i> +<br>AmpB | Average | Average<br>of<br>averages<br>± SD | <i>dpb3ΔΔ</i><br><i>dpb4ΔΔ</i> +<br>AmpB+Trichostatin A | Average | Average<br>of<br>averages<br>± SD | Average<br>of<br>averages<br>± SD | <i>dpb3ΔΔ</i><br><i>dpb4ΔΔ</i> +<br>AmpB vs<br><i>dpb3ΔΔ</i><br><i>dpb4ΔΔ</i> +<br>AmpB+Trichostatin A |
| Set 1 | 0         | 0.103<br>0.105                 | 0.104   | 0.102±0.002                       | 0.104<br>0.107                                     | 0.1055  | 0.105±0.0005                      | 0.113<br>0.109                           | 0.111   | 0.10925±0.001                     | 0.112<br>0.107                                          | 0.1095  | 0.10825±0.001                     | 0.10825±0.001                     | 0.9997                                                                                                 |
| Set 2 | 0         | 0.102<br>0.098                 | 0.1     |                                   | 0.106<br>0.103                                     | 0.1045  |                                   | 0.105<br>0.11                            | 0.1075  |                                   | 0.109<br>0.105                                          | 0.107   |                                   |                                   |                                                                                                        |
| Set 1 | 3         | 0.279<br>0.294                 | 0.2865  |                                   | 0.311<br>0.287                                     | 0.299   |                                   | 0.186<br>0.186                           | 0.186   |                                   | 0.213<br>0.231                                          | 0.222   |                                   |                                   |                                                                                                        |
| Set 2 | 3         | 0.267<br>0.287                 | 0.277   | 0.28175±0.0047                    | 0.279<br>0.298                                     | 0.2885  | 0.29375±0.0052                    | 0.175<br>0.198                           | 0.1865  | 0.18625±0.0002                    | 0.225<br>0.241                                          | 0.233   | 0.2275±0.005                      | 0.2275±0.005                      | 0.021                                                                                                  |
| Set 1 | 6         | 1.162<br>1.145                 | 1.1535  | 1.1575±0.004                      | 1.143<br>1.161                                     | 1.152   | 1.153±0.001                       | 0.417<br>0.405                           | 0.411   | 0.42475±0.013                     | 0.4<br>0.418                                            | 0.409   | 0.421±0.012                       | 0.421±0.012                       | 0.9881                                                                                                 |
| Set 2 | 6         | 1.156<br>1.167                 | 1.1615  |                                   | 1.136<br>1.172                                     | 1.154   |                                   | 0.456<br>0.421                           | 0.4385  |                                   | 0.412<br>0.454                                          | 0.433   |                                   |                                   |                                                                                                        |
| Set 1 | 9         | 2.245<br>2.321                 | 2.283   |                                   | 2.319<br>2.351                                     | 2.335   |                                   | 0.857<br>0.739                           | 0.798   |                                   | 0.657<br>0.677                                          | 0.667   |                                   |                                   |                                                                                                        |
| Set 2 | 9         | 2.227<br>2.412                 | 2.3195  | 2.30125±0.0182                    | 2.359<br>2.243                                     | 2.301   | 2.318±0.017                       | 0.816<br>0.769                           | 0.7925  | 0.79525±0.002                     | 0.631<br>0.684                                          | 0.6575  | 0.66225±0.004                     | 0.66225±0.004                     | <0.0001                                                                                                |
| Set 1 | 12        | 2.554<br>2.598                 | 2.576   | 2.5655±0.010                      | 2.585<br>2.661                                     | 2.623   | 2.61675±0.006                     | 1.713<br>1.531                           | 1.622   | 1.6455±0.023                      | 1.385<br>1.384                                          | 1.3845  | 1.3635±0.021                      | 1.3635±0.021                      | <0.0001                                                                                                |
| Set 2 | 12        | 2.532<br>2.578                 | 2.555   |                                   | 2.543<br>2.678                                     | 2.6105  |                                   | 1.726<br>1.612                           | 1.669   |                                   | 1.298<br>1.387                                          | 1.3425  |                                   |                                   |                                                                                                        |
| Set 1 | 15        | 2.745<br>2.797                 | 2.771   |                                   | 2.839<br>2.787                                     | 2.813   |                                   | 2.759<br>2.756                           | 2.7575  |                                   | 2.401<br>2.349                                          | 2.375   |                                   |                                   |                                                                                                        |
| Set 2 | 15        | 2.812<br>2.765                 | 2.7885  | 2.77975±0.0087                    | 2.822<br>2.795                                     | 2.8085  | 2.81075±0.002                     | 2.746<br>2.739                           | 2.7425  | 2.75±0.007                        | 2.359<br>2.423                                          | 2.391   | 2.383±0.008                       | 2.383±0.008                       | <0.0001                                                                                                |
| Set 1 | 18        | 2.875<br>2.912                 | 2.8935  | 2.88525±0.0082                    | 2.889<br>2.854                                     | 2.8715  | 2.875±0.003                       | 2.854<br>2.865                           | 2.8595  | 2.87125±0.011                     | 2.654<br>2.685                                          | 2.6695  | 2.668±0.0015                      | 2.668±0.0015                      | <0.0001                                                                                                |
| Set 2 | 18        | 2.865<br>2.889                 | 2.877   |                                   | 2.872<br>2.885                                     | 2.8785  |                                   | 2.895<br>2.871                           | 2.883   |                                   | 2.662<br>2.671                                          | 2.6665  |                                   |                                   |                                                                                                        |
| Set 1 | 21        | 2.974<br>2.965                 | 2.9695  |                                   | 2.878<br>2.884                                     | 2.881   |                                   | 2.845<br>2.912                           | 2.8785  |                                   | 2.845<br>2.865                                          | 2.855   |                                   |                                   |                                                                                                        |
| Set 2 | 21        | 2.945<br>2.965                 | 2.955   | 2.96225±0.0072                    | 2.915<br>2.896                                     | 2.9055  | 2.89325±0.012                     | 2.875<br>2.906                           | 2.8905  | 2.8845±0.006                      | 2.912<br>2.886                                          | 2.899   | 2.877±0.022                       | 2.877±0.022                       | 0.9179                                                                                                 |

**Supplementary Table-S5:** The growth curve analyses of WT, *dpb3* $\Delta\Delta$ , *dpb4* $\Delta\Delta$ , and *dpb3* $\Delta\Delta*dpb4* $\Delta\Delta$  strains were carried out with 5FC. The absorbance measured at different time points and statistical analysis has been given.$

|       |           |       |         | Average of averages $\pm$ SD | <i>dpb3</i> $\Delta\Delta$ | Average | Average of averages $\pm$ SD | <i>dpb4</i> $\Delta\Delta$ | Average | Average of averages $\pm$ SD | <i>dpb3</i> $\Delta\Delta$<br><i>dpb4</i> $\Delta\Delta$ | Average | Average of averages $\pm$ SD | P value                          |                                  |                                                                |
|-------|-----------|-------|---------|------------------------------|----------------------------|---------|------------------------------|----------------------------|---------|------------------------------|----------------------------------------------------------|---------|------------------------------|----------------------------------|----------------------------------|----------------------------------------------------------------|
|       | Time(hrs) | WT    | Average |                              |                            |         |                              |                            |         |                              |                                                          |         |                              | WT vs <i>dpb3</i> $\Delta\Delta$ | WT vs <i>dpb4</i> $\Delta\Delta$ | WT vs <i>dpb3</i> $\Delta\Delta$<br><i>dpb4</i> $\Delta\Delta$ |
| Set 1 | 0         | 0.111 | 0.1095  | 0.1085 $\pm$ 0.001           | 0.103                      | 0.106   | 0.105 $\pm$ 0.001            | 0.108                      | 0.1035  | 0.10525 $\pm$ 0.001          | 0.106                                                    | 0.1035  | 0.1035                       | 0.9994                           | 0.9996                           | 0.9985                                                         |
|       |           | 0.108 |         |                              | 0.109                      |         |                              | 0.099                      |         |                              | 0.101                                                    |         |                              |                                  |                                  |                                                                |
| Set 2 | 0         | 0.106 | 0.1075  | 0.1085 $\pm$ 0.001           | 0.103                      | 0.104   | 0.105 $\pm$ 0.001            | 0.106                      | 0.107   | 0.10525 $\pm$ 0.001          | 0.103                                                    | 0.1035  | 0.1035                       | 0.9994                           | 0.9996                           | 0.9985                                                         |
|       |           | 0.109 |         |                              | 0.105                      |         |                              | 0.108                      |         |                              | 0.104                                                    |         |                              |                                  |                                  |                                                                |
| Set 1 | 2         | 0.171 | 0.1715  | 0.1705 $\pm$ 0.001           | 0.198                      | 0.2035  | 0.20025 $\pm$ 0.003          | 0.203                      | 0.2045  | 0.21125 $\pm$ 0.006          | 0.2                                                      | 0.205   | 0.214 $\pm$ 0.009            | 0.7917                           | 0.6051                           | 0.5576                                                         |
|       |           | 0.172 |         |                              | 0.209                      |         |                              | 0.206                      |         |                              | 0.21                                                     |         |                              |                                  |                                  |                                                                |
| Set 2 | 2         | 0.169 | 0.1695  | 0.1705 $\pm$ 0.001           | 0.205                      | 0.197   | 0.20025 $\pm$ 0.003          | 0.215                      | 0.218   | 0.21125 $\pm$ 0.006          | 0.231                                                    | 0.223   | 0.214 $\pm$ 0.009            | 0.7917                           | 0.6051                           | 0.5576                                                         |
|       |           | 0.17  |         |                              | 0.189                      |         |                              | 0.221                      |         |                              | 0.215                                                    |         |                              |                                  |                                  |                                                                |
| Set 1 | 4         | 0.376 | 0.371   | 0.369 $\pm$ 0.002            | 0.398                      | 0.404   | 0.41125 $\pm$ 0.007          | 0.403                      | 0.4095  | 0.4185 $\pm$ 0.009           | 0.417                                                    | 0.4145  | 0.42775 $\pm$ 0.013          | 0.5791                           | 0.4581                           | 0.3238                                                         |
|       |           | 0.366 |         |                              | 0.41                       |         |                              | 0.416                      |         |                              | 0.412                                                    |         |                              |                                  |                                  |                                                                |
| Set 2 | 4         | 0.359 | 0.367   | 0.369 $\pm$ 0.002            | 0.421                      | 0.4185  | 0.41125 $\pm$ 0.007          | 0.424                      | 0.4275  | 0.4185 $\pm$ 0.009           | 0.436                                                    | 0.441   | 0.42775 $\pm$ 0.013          | 0.5791                           | 0.4581                           | 0.3238                                                         |
|       |           | 0.375 |         |                              | 0.416                      |         |                              | 0.431                      |         |                              | 0.446                                                    |         |                              |                                  |                                  |                                                                |
| Set 1 | 6         | 0.62  | 0.6305  | 0.63625 $\pm$ 0.005          | 0.733                      | 0.737   | 0.74925 $\pm$ 0.012          | 0.743                      | 0.741   | 0.7565 $\pm$ 0.015           | 0.754                                                    | 0.751   | 0.76475 $\pm$ 0.013          | 0.0185                           | 0.0116                           | 0.0067                                                         |
|       |           | 0.641 |         |                              | 0.741                      |         |                              | 0.739                      |         |                              | 0.748                                                    |         |                              |                                  |                                  |                                                                |
| Set 2 | 6         | 0.609 | 0.642   | 0.63625 $\pm$ 0.005          | 0.754                      | 0.7615  | 0.74925 $\pm$ 0.012          | 0.765                      | 0.772   | 0.7565 $\pm$ 0.015           | 0.785                                                    | 0.7785  | 0.76475 $\pm$ 0.013          | 0.0185                           | 0.0116                           | 0.0067                                                         |
|       |           | 0.675 |         |                              | 0.769                      |         |                              | 0.779                      |         |                              | 0.772                                                    |         |                              |                                  |                                  |                                                                |
| Set 1 | 8         | 1.108 | 1.1075  | 1.11425 $\pm$ 0.006          | 1.231                      | 1.243   | 1.25175 $\pm$ 0.008          | 1.243                      | 1.25    | 1.27125 $\pm$ 0.021          | 1.265                                                    | 1.2785  | 1.2885 $\pm$ 0.01            | 0.0036                           | 0.0009                           | 0.0003                                                         |
|       |           | 1.107 |         |                              | 1.255                      |         |                              | 1.257                      |         |                              | 1.292                                                    |         |                              |                                  |                                  |                                                                |
| Set 2 | 8         | 1.119 | 1.121   | 1.11425 $\pm$ 0.006          | 1.256                      | 1.2605  | 1.25175 $\pm$ 0.008          | 1.284                      | 1.2925  | 1.27125 $\pm$ 0.021          | 1.285                                                    | 1.2985  | 1.2885 $\pm$ 0.01            | 0.0036                           | 0.0009                           | 0.0003                                                         |
|       |           | 1.123 |         |                              | 1.265                      |         |                              | 1.301                      |         |                              | 1.312                                                    |         |                              |                                  |                                  |                                                                |
| Set 1 | 10        | 1.666 | 1.6945  | 1.66175 $\pm$ 0.032          | 1.889                      | 1.845   | 1.86325 $\pm$ 0.018          | 1.823                      | 1.848   | 1.89375 $\pm$ 0.045          | 1.823                                                    | 1.898   | 1.90525 $\pm$ 0.007          | <0.0001                          | <0.0001                          | <0.0001                                                        |
|       |           | 1.723 |         |                              | 1.801                      |         |                              | 1.873                      |         |                              | 1.973                                                    |         |                              |                                  |                                  |                                                                |
| Set 2 | 10        | 1.56  | 1.629   | 1.66175 $\pm$ 0.032          | 1.858                      | 1.8815  | 1.86325 $\pm$ 0.018          | 1.934                      | 1.9395  | 1.89375 $\pm$ 0.045          | 1.878                                                    | 1.9125  | 1.90525 $\pm$ 0.007          | <0.0001                          | <0.0001                          | <0.0001                                                        |
|       |           | 1.698 |         |                              | 1.905                      |         |                              | 1.945                      |         |                              | 1.947                                                    |         |                              |                                  |                                  |                                                                |
| Set 1 | 12        | 2.089 | 2.0665  | 2.12075 $\pm$ 0.054          | 2.234                      | 2.2275  | 2.2845 $\pm$ 0.057           | 2.249                      | 2.254   | 2.29175 $\pm$ 0.037          | 2.226                                                    | 2.2355  | 2.29875 $\pm$ 0.063          | 0.0006                           | 0.0003                           | 0.0002                                                         |
|       |           | 2.044 |         |                              | 2.221                      |         |                              | 2.259                      |         |                              | 2.245                                                    |         |                              |                                  |                                  |                                                                |
| Set 2 | 12        | 2.12  | 2.175   | 2.12075 $\pm$ 0.054          | 2.324                      | 2.3415  | 2.2845 $\pm$ 0.057           | 2.361                      | 2.3295  | 2.29175 $\pm$ 0.037          | 2.345                                                    | 2.362   | 2.29875 $\pm$ 0.063          | 0.0006                           | 0.0003                           | 0.0002                                                         |
|       |           | 2.23  |         |                              | 2.359                      |         |                              | 2.298                      |         |                              | 2.379                                                    |         |                              |                                  |                                  |                                                                |
| Set 1 | 14        | 2.344 | 2.3625  | 2.3975 $\pm$ 0.035           | 2.412                      | 2.3665  | 2.40475 $\pm$ 0.038          | 2.412                      | 2.4035  | 2.44175 $\pm$ 0.038          | 2.379                                                    | 2.362   | 2.4260 $\pm$ 0.064           | 0.9955                           | 0.5448                           | 0.811                                                          |
|       |           | 2.381 |         |                              | 2.321                      |         |                              | 2.395                      |         |                              | 2.345                                                    |         |                              |                                  |                                  |                                                                |
| Set 2 | 14        | 2.487 | 2.4325  | 2.3975 $\pm$ 0.035           | 2.408                      | 2.443   | 2.40475 $\pm$ 0.038          | 2.523                      | 2.48    | 2.44175 $\pm$ 0.038          | 2.487                                                    | 2.49    | 2.4260 $\pm$ 0.064           | 0.9955                           | 0.5448                           | 0.811                                                          |
|       |           | 2.378 |         |                              | 2.478                      |         |                              | 2.437                      |         |                              | 2.493                                                    |         |                              |                                  |                                  |                                                                |
| Set 1 | 16        | 2.412 | 2.405   | 2.44 $\pm$ 0.035             | 2.432                      | 2.4865  | 2.4855 $\pm$ 0.001           | 2.512                      | 2.522   | 2.542 $\pm$ 0.002            | 2.462                                                    | 2.454   | 2.4875 $\pm$ 0.033           | 0.5237                           | 0.0363                           | 0.4905                                                         |
|       |           | 2.398 |         |                              | 2.541                      |         |                              | 2.532                      |         |                              | 2.446                                                    |         |                              |                                  |                                  |                                                                |
| Set 2 | 16        | 2.512 | 2.475   | 2.44 $\pm$ 0.035             | 2.456                      | 2.4845  | 2.4855 $\pm$ 0.001           | 2.557                      | 2.562   | 2.542 $\pm$ 0.002            | 2.511                                                    | 2.521   | 2.4875 $\pm$ 0.033           | 0.5237                           | 0.0363                           | 0.4905                                                         |
|       |           | 2.438 |         |                              | 2.513                      |         |                              | 2.567                      |         |                              | 2.531                                                    |         |                              |                                  |                                  |                                                                |
